# Supplementary material for: Surface-state dependent optical properties of OH-, F-, and H-terminated 4H-SiC quantum dots
Source: Royal Society of Chemistry journal article supplement (doi:10.1039/c6cp03775e), 2016-01-01
Supplement: c6cp03775e1.pdf [file c6cp03775e1.pdf]

## Electronic Supplementary Information for PCCP

### Surface-state dependent optical properties of OH-, F-, and H-terminated 4H-SiC quantum dots

Marzaini Rashid<sup>\*a,b</sup>, A. Tiwari<sup>a</sup>, J. P. Goss<sup>a</sup>, M. Rayson<sup>a</sup>, P. Briddon<sup>a</sup>, A.B. Horsfall<sup>a</sup>

<sup>a</sup>*School of Electrical and Electronic Engineering, Newcastle University, Newcastle Upon Tyne, NE1 7RU, United Kingdom.*

<sup>b</sup>*School of Physics, Universiti Sains Malaysia, 11800, USM, Penang, Malaysia.*

(Dated: 7<sup>th</sup> July, 2016)

\*E-mail: [m.m.b.m.rashid@ncl.ac.uk](mailto:m.m.b.m.rashid@ncl.ac.uk)

This PDF file includes:

Fig. 1 Optimized structures of Si-centered (a) 10 Å, (b) 16 Å and (c) 20 Å diameter H-terminated QDs.

Table. 1 Table listing of SiC-QD cluster composition as a function of QD diameter.

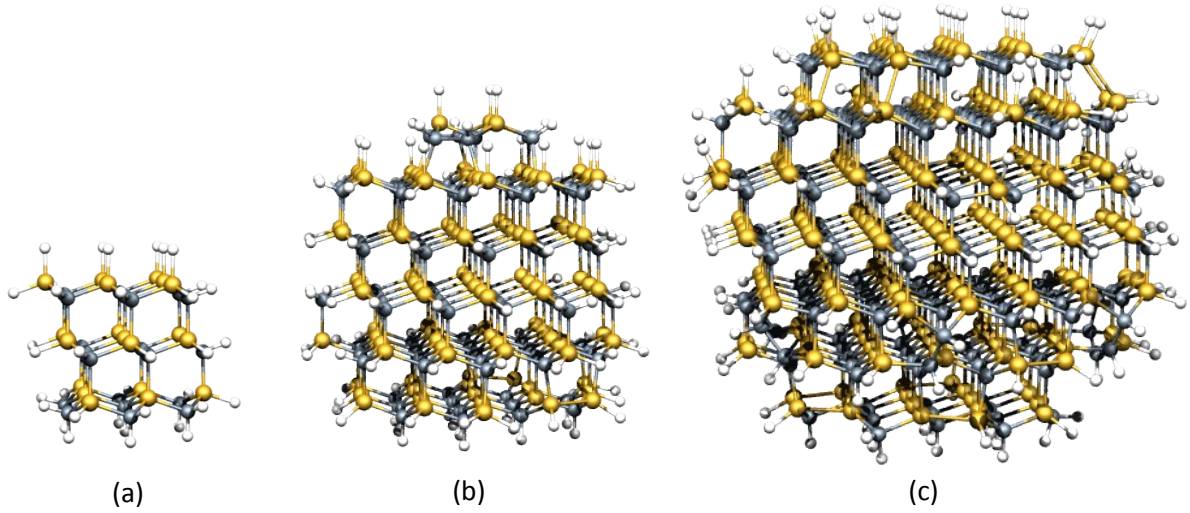

Fig. 1 Optimized structures of Si-centered (a) 10 Å, (b) 16 Å and (c) 20 Å diameter H-terminated QDs.

| Diameter<br>(Å) | $N_{Si}(Si), N_C(C)$ | $N_{Si}(C), N_C(Si)$ | $N_{Surface}$ | $N_{recon.}(Si)$ | $N_{recon.}(C)$ |
|-----------------|----------------------|----------------------|---------------|------------------|-----------------|
| 10              | 19                   | 20                   | 40            | 40               | 40              |
| 11              | 29                   | 29                   | 56            | 44               | 44              |
| 12              | 51                   | 41                   | 82            | 70               | 70              |
| 13              | 57                   | 62                   | 94            | 76               | 76              |
| 14              | 69                   | 74                   | 100           | 88               | 88              |
| 15              | 81                   | 83                   | 112           | 100              | 100             |
| 16              | 99                   | 96                   | 126           | 114              | 114             |
| 17              | 132                  | 118                  | 160           | 130              | 136             |
| 18              | 147                  | 151                  | 172           | 130              | 142             |
| 19              | 159                  | 175                  | 190           | 160              | 148             |
| 20              | 207                  | 199                  | 208           | 166              | 172             |

Table 1. SiC-QD cluster composition as a function of QD diameter. The numbers of Si and C atoms,  $N_{Si}(X)$  and  $N_C(X)$ , listed in the table refer to the  $X$ -centered SiC-QD.  $N_{Surface}$  lists the number of surface sites on the unreconstructed clusters, which is independent of whether the QD is Si or C centered. For reconstructed clusters the number of surface sites is different for Si and C centered cases, with the total number of surface sites on reconstructed  $X$ -centered SiC-QDs being  $N_{recon.}(X)$ .
